# Supplementary material for: Developmental transcriptomics inPristionchusreveals the environmental responsiveness of a plasticity gene-regulatory network
Source: HighWire-hosted journal article supplement (doi:10.1101/gr.279783.124), 2025-06-09
Supplement: Supplemental_Table_S1.xlsx [file Supplemental_Table_S1.xlsx]

## Sheet: Table_S1
Table S1. Details regarding RNA-seq samples for each condition
Sample	Culture Conditions	Time points (h)	# of Replicates/time point	Strain	Mouth form
AG	NGM agar	0, 12, 24, 48, 60, 72	4	PS312	Eu
LC	S-media liquid culture	12, 24, 48, 60, 72	4	PS312	St
eud1	NGM agar	0, 12, 24, 48, 60, 72	2	RS3111	St
eud1TG	NGM agar	0, 12, 24, 48, 60, 72	2	RS2561	Eu
nhr40	NGM agar	0, 12, 24, 48, 60, 72	2	tu505	Eu
mbd2	NGM agar	0, 12, 24, 48, 60, 72	2	tu365	St
lsy12	NGM agar	0, 12, 24, 48, 60, 72	2	tu319	St
nag12	NGM agar	0, 12, 24, 48, 60, 72	2	RS3195	Eu
sult1	NGM agar	0, 12, 24, 48, 60, 72	2	tu1061	Eu
RSC017	NGM agar	0, 24, 48, 72	2	RSC017	St
RS5410	NGM agar	0, 24, 48, 72	2	RS5410	St
RSA100	NGM agar	0, 24, 48, 72	2	RSA100	Eu
RS5427	NGM agar	0, 24, 48, 72	2	RS5427	Eu
Pex	NGM agar	0, 12, 24, 48, 60, 72	2	RS5522B	St
